# Supplementary material for: Structural design of graphene for use in electrochemical energy storage devices
Source: Royal Society of Chemistry journal article supplement (doi:10.1039/c5cs00147a), 2015-01-01
Supplement: c5cs00147a1.pdf [file c5cs00147a1.pdf]

## Supporting information

### Structural design of graphene for electrochemical energy storage

Kunfeng Chen, Shuyan Song, Fei Liu, and Dongfeng Xue\*

State Key Laboratory of Rare Earth Resource Utilization, Changchun Institute of Applied Chemistry, Chinese Academy of Sciences, Changchun 130022, China

\*Corresponding author: E-mail: dongfeng@ciac.ac.cn

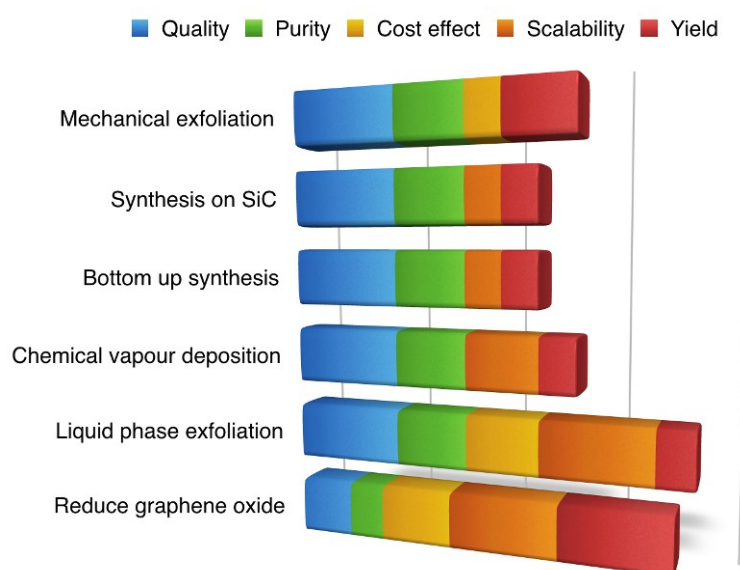

Fig. S1 Comparison of the most common used graphene production methods.
